# Supplementary material
Source: PubMed Central journal article supplement (PMC5770150)
Supplement: NIHMS930217-supplement-Supplemental_Figures.pdf [file NIHMS930217-supplement-Supplemental_Figures.pdf]

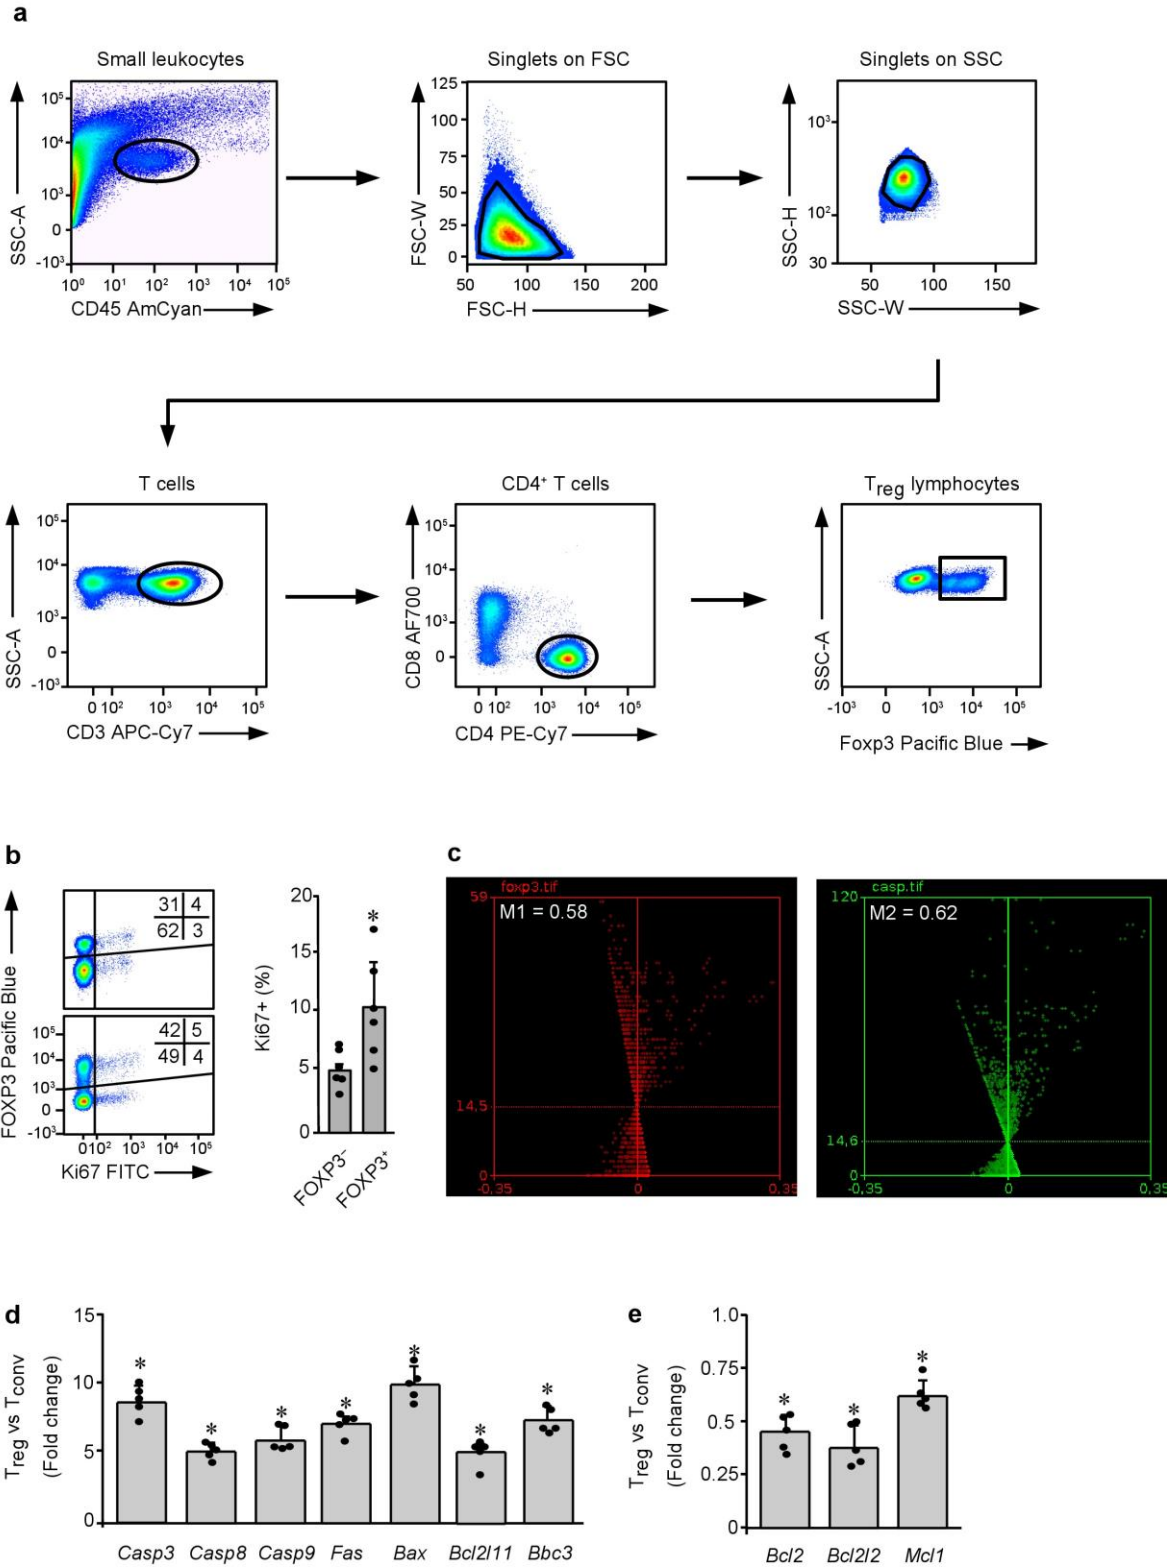

### Supplementary Figure 1

Expression of apoptosis-related genes in tumor T<sub>reg</sub> cells.

(a) Identification of FOXP3 T<sub>reg</sub> cells by FACS. CD45<sup>+</sup> cells were gated as enriched lymphoid cell populations with low-granularity. Singlet cells were gated on the basis of forward and side scatter W and H parameters. Next, T cell subsets were identified on the basis

of CD3, CD4, and CD8 staining. T<sub>reg</sub> cells were identified as FOXP3<sup>+</sup>CD4<sup>+</sup> T cells. FOXP3<sup>-</sup>CD4<sup>+</sup> T cells were conventional T cells. **(b)** Ki67 expression in tumor infiltrating T cell subsets. Ki67 expression was detected in human ovarian cancer infiltrating FOXP3<sup>+</sup> and FOXP3<sup>-</sup>CD45<sup>+</sup>CD3<sup>+</sup>CD4<sup>+</sup> cells. Ki67 expression was shown in CD4<sup>+</sup> T cells from two representative ovarian cancer specimens (left panel) and in FOXP3<sup>-</sup> and FOXP3<sup>+</sup>CD4<sup>+</sup> T cell subsets (right panel). mean  $\pm$  s.d.,  $n = 10$ , Student's  $t$ -test, \*  $P < 0.05$ . **(c)** Split Manders' coefficient plot depicts the colocalization of FOXP3 (red) and cleaved CASP3 (green) in human ovarian cancer section. One representative of 10 is shown. **(d,e)** Effect of mouse tumor medium on T<sub>reg</sub> cell gene expression. Normal mouse GFP<sup>+</sup> T<sub>reg</sub> cells and GFP<sup>-</sup> conventional T cells were cultured with MC38-medium for 24 hours. Expression of pro-apoptotic **(d)** and anti-apoptotic **(e)** genes was quantified by real-time PCR. The level of each gene in T<sub>reg</sub> cells was normalized to that in conventional T cells. Data are shown as mean  $\pm$  s.d.,  $n = 5$ ; Student's  $t$ -test, \* $P < 0.05$ .

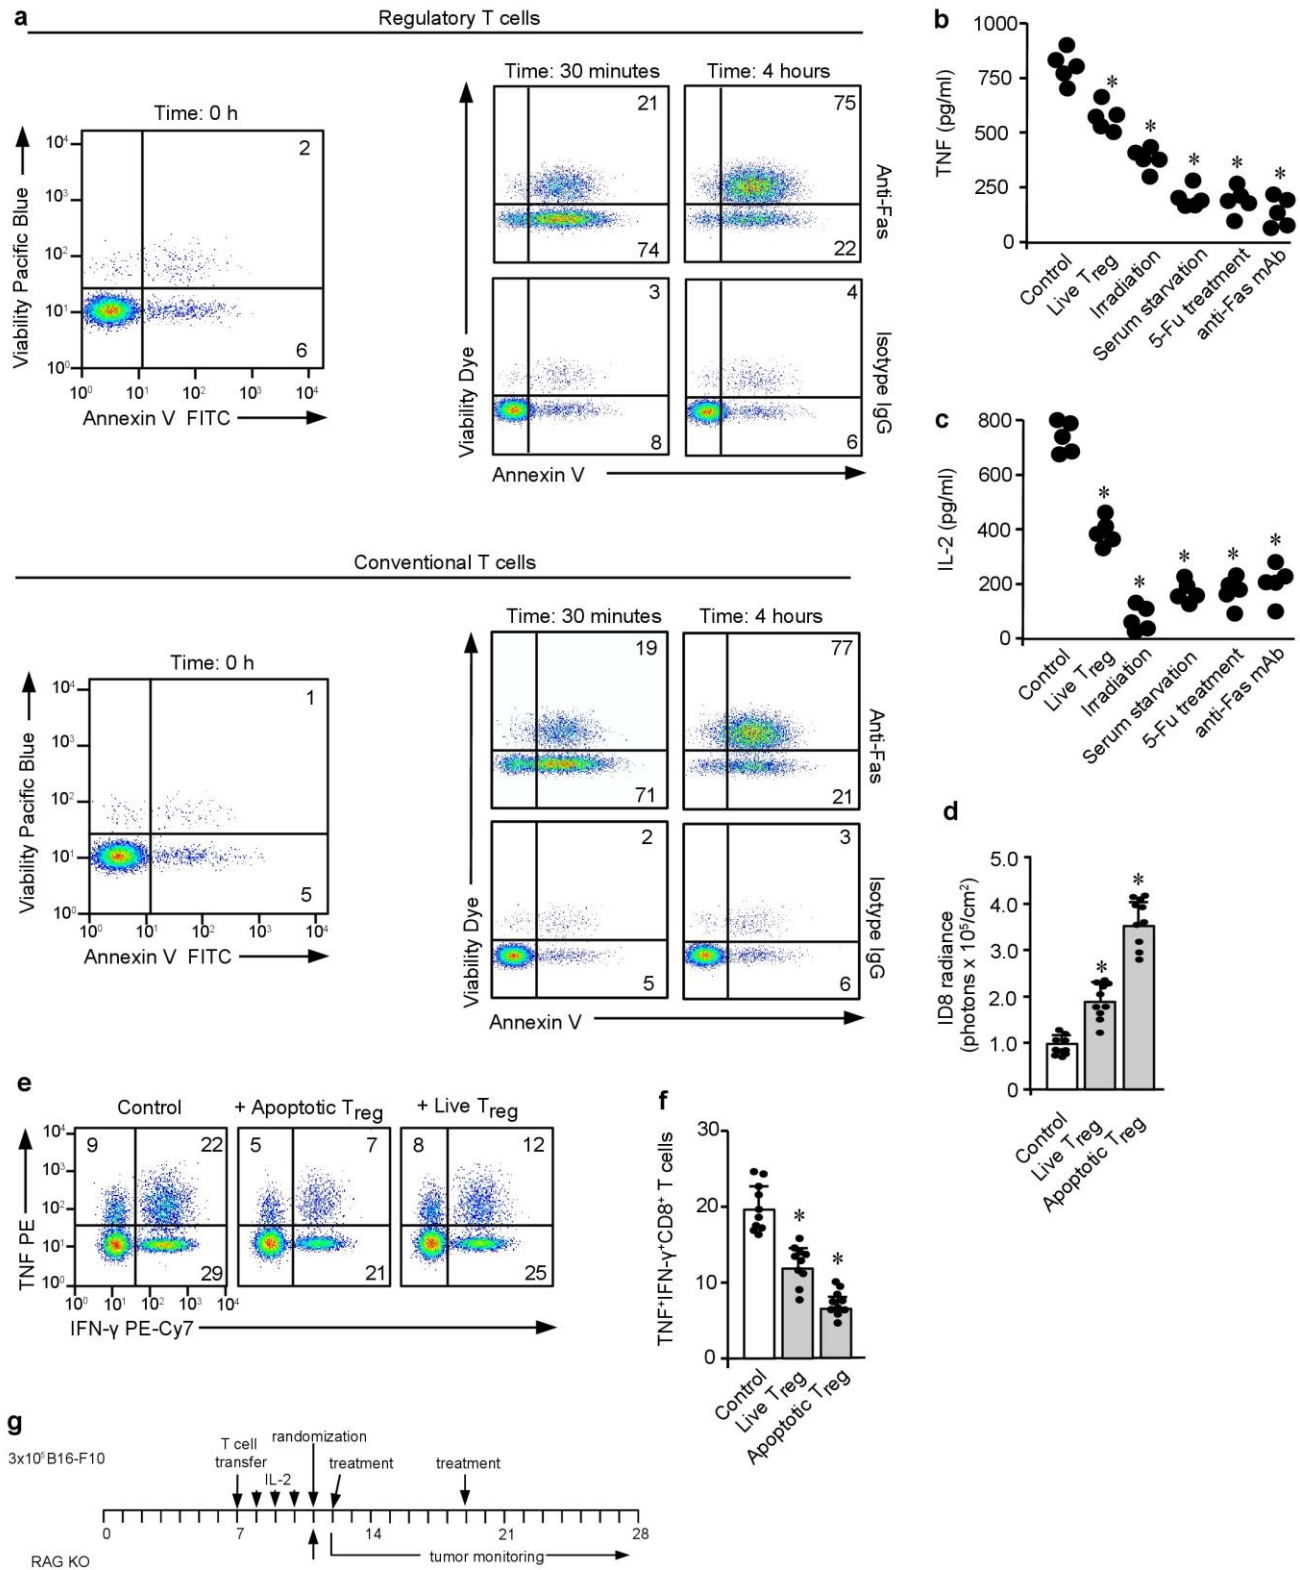

### Supplementary Figure 2

Suppressive activity of mouse live and apoptotic T<sub>reg</sub> cells.

(a) Representative dot plots show T<sub>reg</sub> and T<sub>conv</sub> apoptosis induced by anti-FAS mAb Jo-1. Annexin V expression was analyzed by FACS at 30 minutes and 4 hours. (b,c) Mouse T<sub>reg</sub> apoptosis was induced by different conditions. T cell suppressive assay was

performed with these apoptotic T<sub>reg</sub> cells. T cell TNF (**b**) and IL-2 (**c**) were measured on day 3 by ELISA,  $n = 5$ , Student's *t*-test,  $*P < 0.05$ . (**d-f**) Effect of live and apoptotic T<sub>reg</sub> cells on ID8-OVA tumor immunity. ID8-OVA-bearing mice were treated with live and apoptotic T<sub>reg</sub> cells. Tumor growth is shown as final bioluminescent signal quantification (**d**). Effector T cell cytokine expression (**e, f**) was detected in cancer ascites fluid. Data presented as mean  $\pm$  s.d.,  $n = 10$  animals per group; ANOVA with Dunnett post-hoc test,  $*P < 0.05$ . (**g**) Scheme of pmel-specific B16-F10 model. B16-F10 tumor bearing RAG2<sup>-/-</sup> mice received Pmel-specific T cells and intratumoral apoptotic Treg cell administration as indicated.

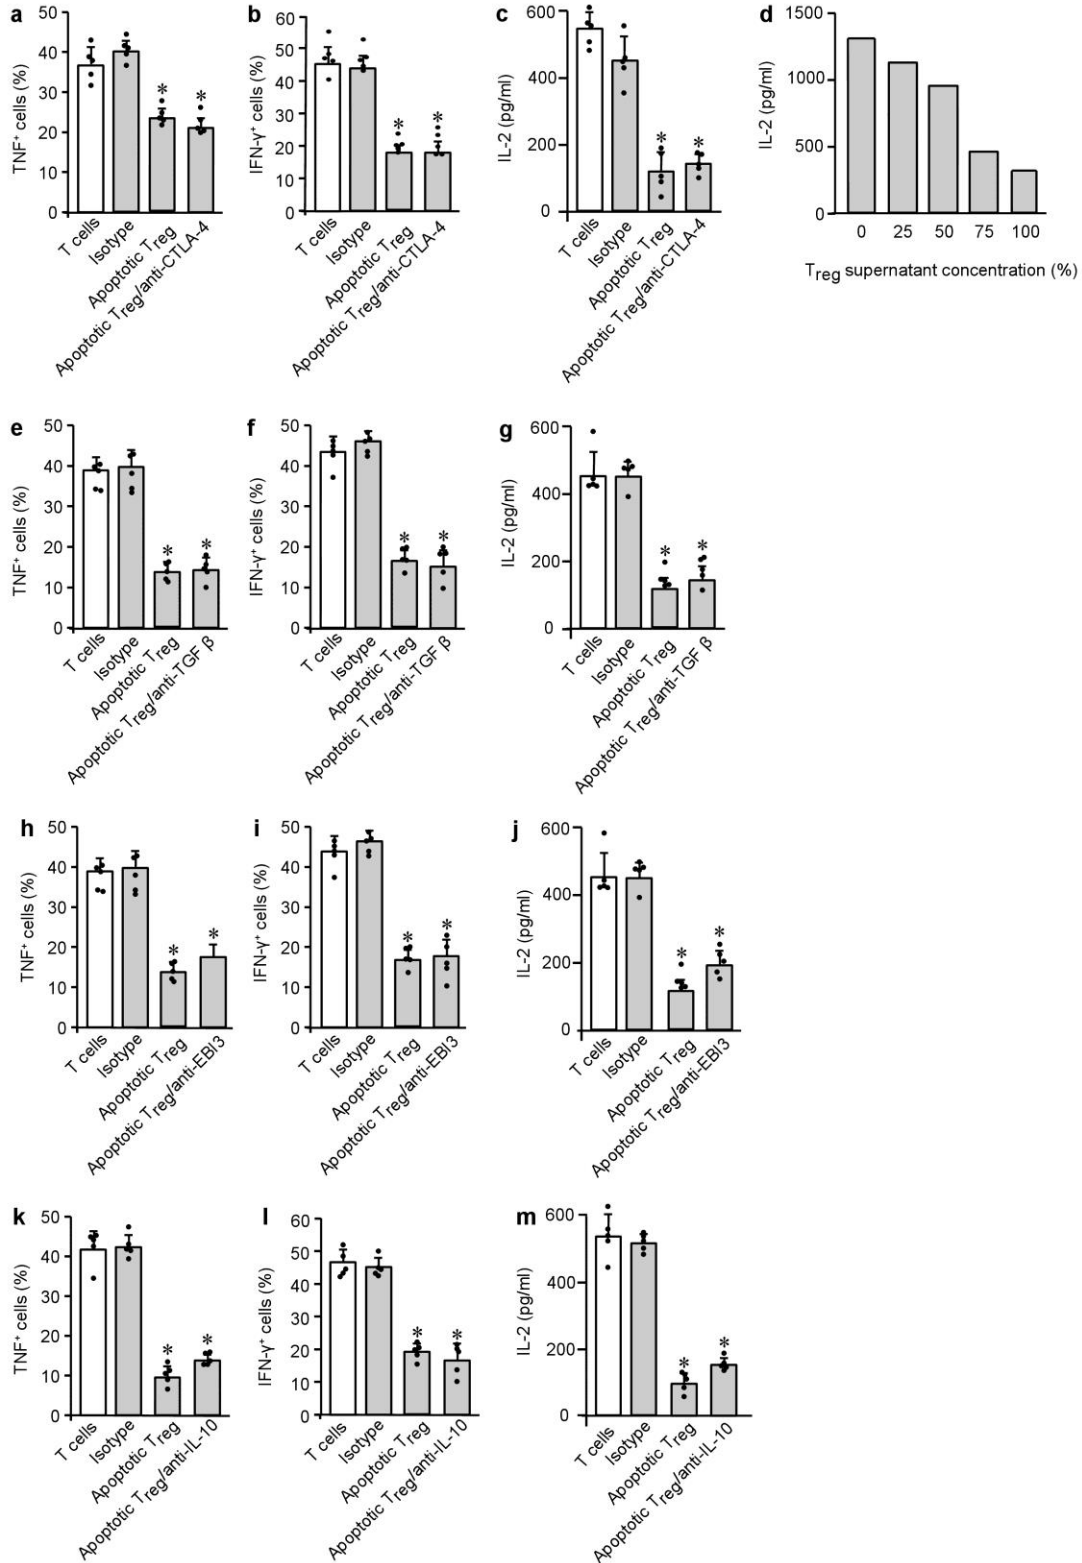

**Supplementary Figure 3**

Apoptotic T<sub>reg</sub> cells mediated immunosuppression via small and non-protein molecules.

(a-c) Effect of CTLA-4 blockade on apoptotic Treg-mediated immunosuppression. T cell immunosuppressive assay was performed with apoptotic T<sub>reg</sub> cells in the presence of anti-CTLA4 mAb. TNF (a) and IFN-γ (b) were analyzed by FACS on day 3 and IL-2 (c) was

detected by ELISA on day 5  $n = 5$ , ANOVA with Dunnett's post-hoc test,  $*P < 0.05$ . **(d)** Effect of apoptotic Treg supernatants on T cell IL-2 production. Apoptotic Treg supernatants were collected at 6 hour time point and were added into T cell culture. T cell IL-2 was measured by ELISA. One of 3 experiments is shown. **(e-m)** Effect of the indicated cytokine blockade on apoptotic Treg cell-mediated immunosuppression. T cell immunosuppressive assay was performed with apoptotic T<sub>reg</sub> cells in the presence of anti-TGF- $\beta$  **(e-g)**, anti-EBI3 **(h-j)**, and anti-IL-10 **(k-l)** mAbs. TNF **(e, h, k)** and IFN- $\gamma$  **(f, i, l)** were analyzed by FACS on day 3. IL-2 **(g, j, m)** was detected by ELISA on day 5.  $n = 5$ , ANOVA with Dunnett's post-hoc test,  $*P < 0.05$ .

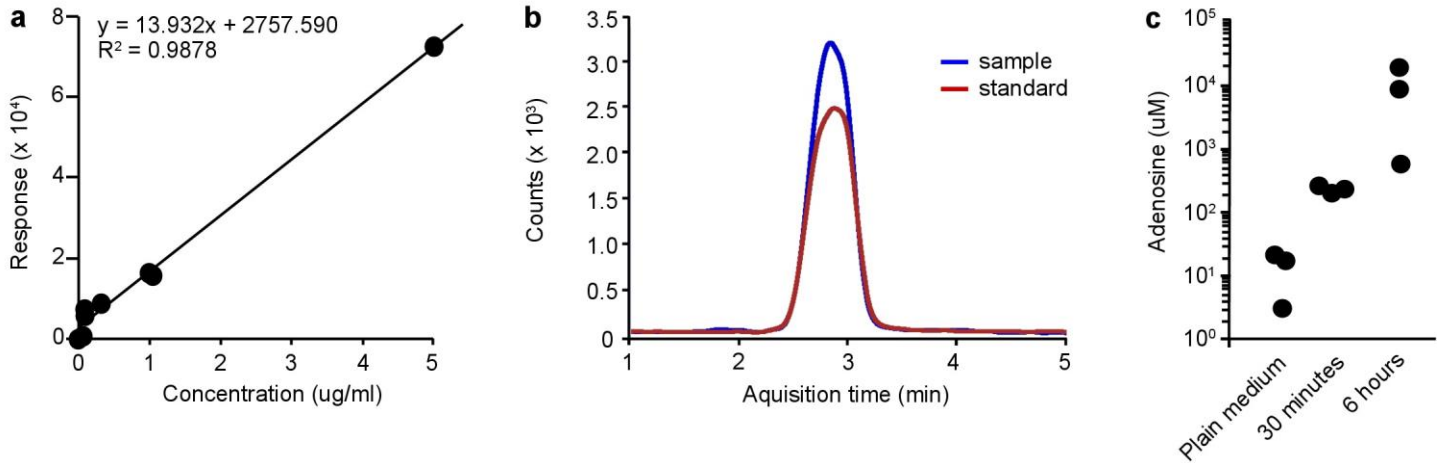

#### Supplementary Figure 4

Adenosine production by apoptotic  $T_{\text{reg}}$  cells.

$T_{\text{reg}}$  cell apoptosis was induced with anti-Fas mAb. Adenosine was measured by mass spectrometry in supernatants collected at different time points. Based on the standard curve (a) and the extracted ion chromatogram (b), adenosine was detected at 0.5 and 6 hours after induction of apoptosis (c). One of 3 independent experiments is shown.

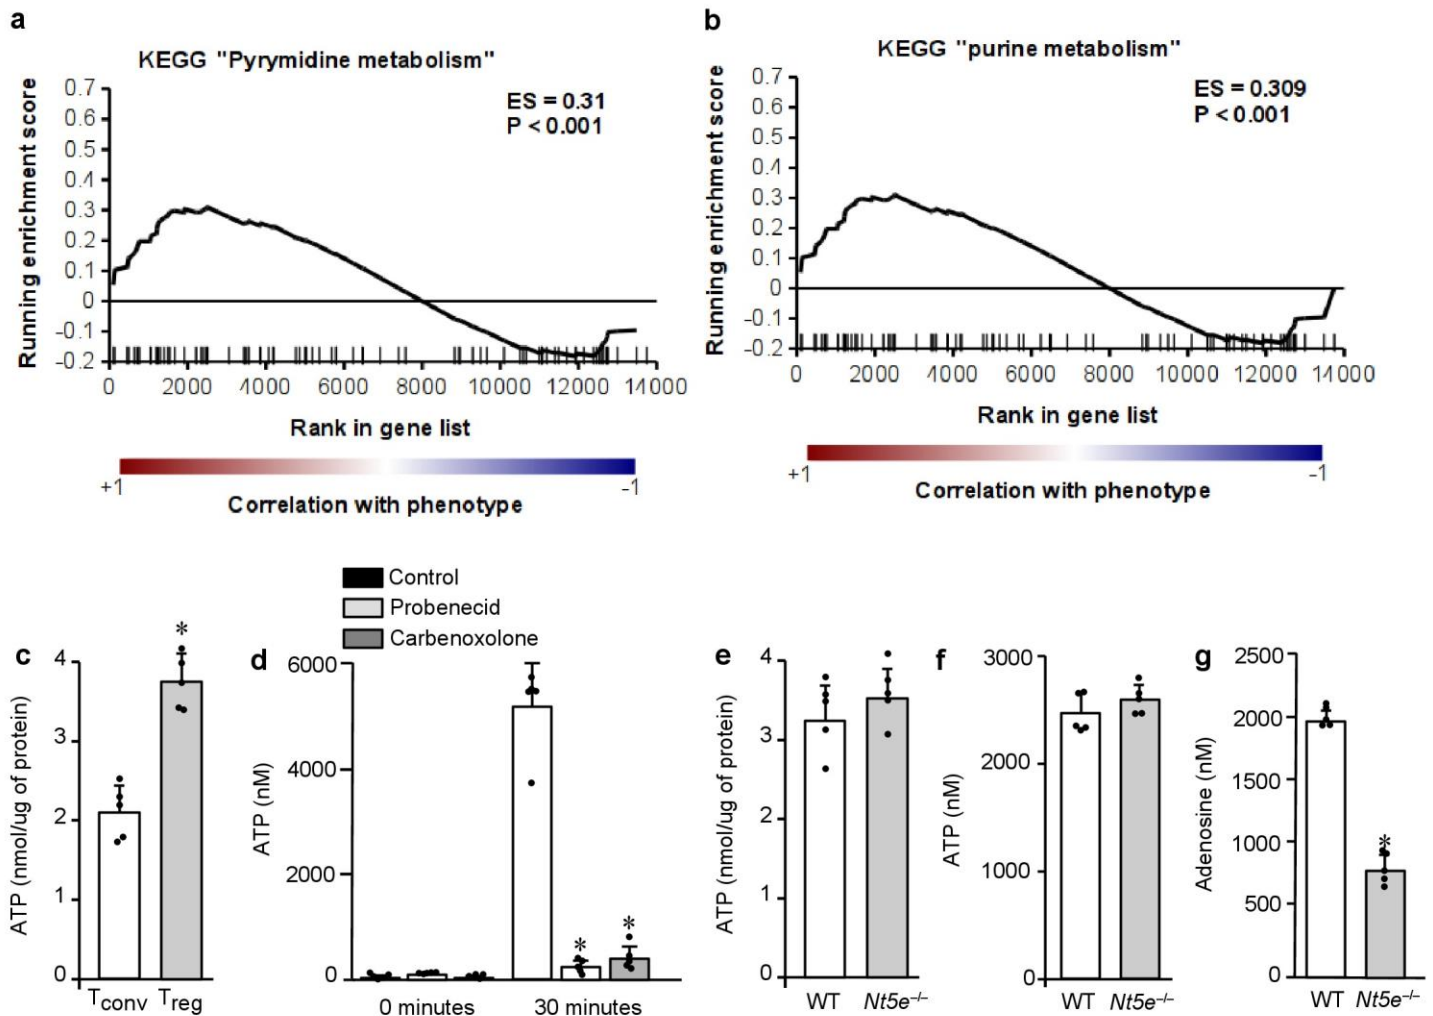

### Supplementary Figure 5

The metabolic profile of  $T_{reg}$  cells.

(a,b) Purine (a) and pyrimidine (b) associated metabolism pathway in tumor associated  $T_{reg}$  cells. GSEA analysis was performed in tumor associated  $T_{reg}$  cells compared to conventional T cells at GSE55705 data set from GEO database. (c) Intracellular content of ATP in  $T_{reg}$  cells and  $T_{conv}$ . ATP level was measured in cell lysates with comparable amount of protein by colorimetric assay. Data shown as mean  $\pm$  s.d., Student's *t*-test,  $n = 5$ , \* $P < 0.05$ . (d) Effect of the pannexin-1 channel inhibitors on apoptotic  $T_{reg}$  ATP release. Apoptosis was induced by anti-FAS treatment in the presence or absence of inhibitors probenecid and carbenoxolone. ATP in the supernatants was measured by colorimetric assay. Data presented as mean  $\pm$  s.d., Student's *t*-test,  $n = 5$ , \* $P < 0.05$  in comparison with control. (e,f) Intracellular (e) and released (f) ATP in live (e) and apoptotic (f) wild-type or  $Nt5e^{-/-}$  mouse  $T_{reg}$  cells. ATP level in whole cells was normalized to total protein expression (e). ATP in apoptotic  $T_{reg}$  cell supernatants was shown at 30 minutes (f).  $n = 5$ , paired Student's *t*-test, \* $P > 0.05$ . (g) Adenosine production by wild-type and  $Nt5e^{-/-}$  apoptotic  $T_{reg}$  cells.  $T_{reg}$  cell apoptosis was induced with anti-FAS and the supernatants were collected at 30 minutes. After deproteinization, adenosine was measured by colorimetric assay. Data shown as mean  $\pm$  s.d.,  $n = 5$ , Student's *t*-test, \* $P < 0.05$ .



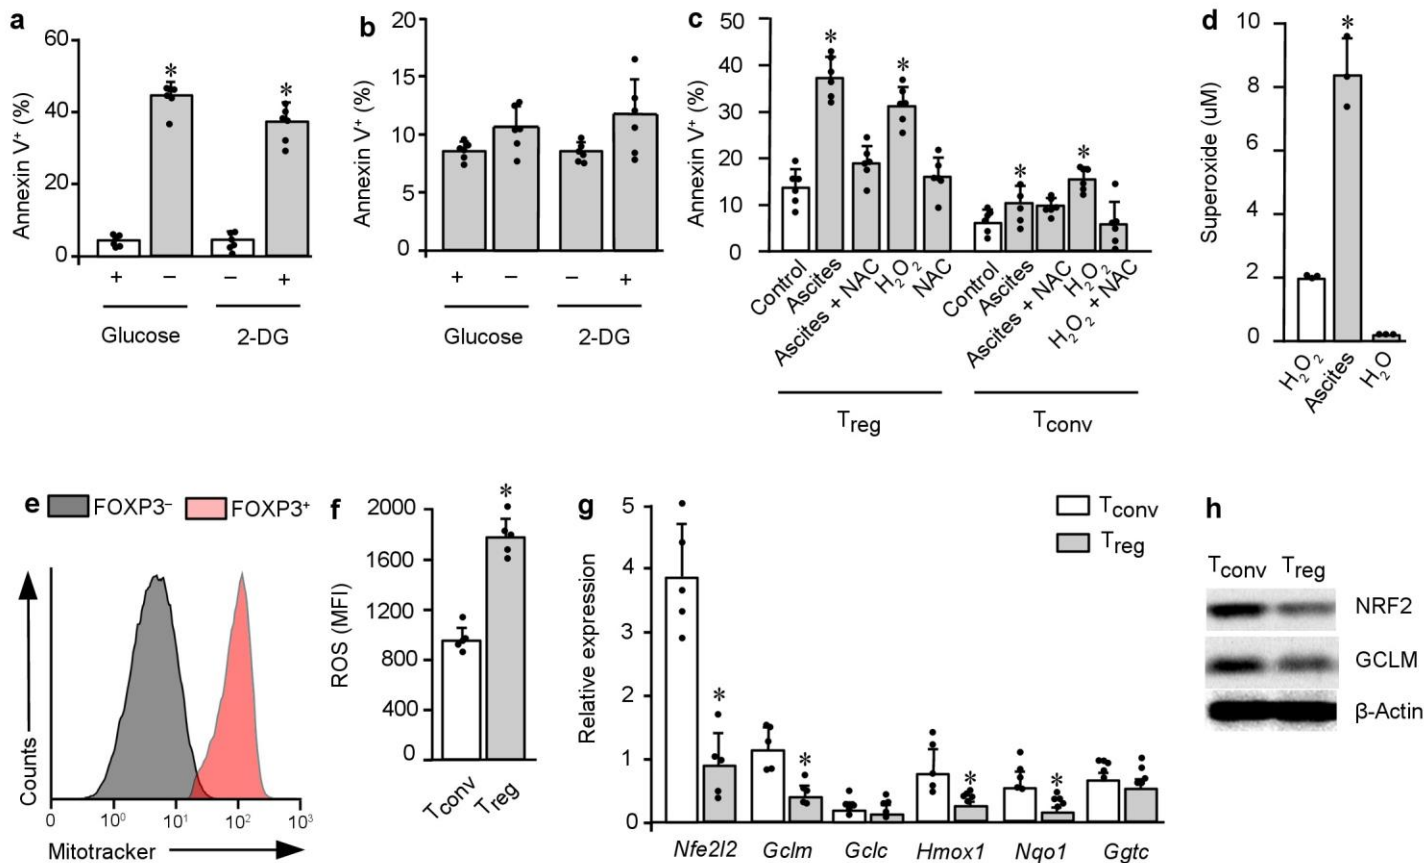

### Supplementary Figure 6

The effect of tumor oxidative stress on T<sub>reg</sub> cells.

(a,b) Effect of glucose restriction and 2-DG on conventional T cell (a) and Treg (b) apoptosis. Human T cell subsets were cultured with or without glucose or 2-DG for 24 hours. Annexin V<sup>+</sup> T cells were measured by flow cytometry. One-way ANOVA with Dunnet's post-hoc test, \**P* < 0.05. (c) Effect of human ovarian cancer ascites on Treg apoptosis. Mouse T<sub>reg</sub> cells and conventional T cells (Tconv) were co-cultured with 50% ascites from intraperitoneal ID8 ovarian cancer bearing animals or hydrogen peroxide for 24 hours. Additional cultures were treated with NAC as a free radical scavenger. Annexin V<sup>+</sup> T<sub>reg</sub> cells and Tconv were analyzed by flow cytometry. Data presented as mean ± s.d., *n* = 6, \**P* < 0.05. (d) Superoxide level in human ascites. The concentration of superoxide was measured with colorimetric test. Water contains 2 μM H<sub>2</sub>O<sub>2</sub> as a positive control. Data are shown as mean ± s.d., *n* = 3. (e) Mitochondrial load of mouse T<sub>reg</sub> cells. The cells were treated with fluorescent mitochondrial activity dye (Mitotracker) and analyzed by flow cytometry. One of 3 assays is shown. (f) Level of reactive oxygen species (ROS) in ovarian cancer infiltrating conventional T cells and T<sub>reg</sub> cells. The level of ROS was tested by CellROX Green and ROS content was shown as mean fluorescence intensity. Data shown as mean ± s.d., *n* = 5, Student's *t*-test, \**P* < 0.05. (g,h) Expression of human Nrf2 and NRF2-associated genes and proteins in T<sub>reg</sub> cells. *Nfe2l2* and NRF2-associated gene transcripts (g) and proteins (h) were determined in T cell subsets by real-time PCR and immunoblotting, respectively. Data presented as mean ± s.d., *n* = 5, paired Student's *t*-test, \**P* < 0.05

**Supplementary Table 1.** Enrichment of Gene Ontology Terms in T<sub>reg</sub> cells compared to conventional T cells in B16 melanoma tissues (data series GSE55705).

| Up-regulated genes                             |            |             |              |
|------------------------------------------------|------------|-------------|--------------|
| GO term                                        | GO ID      | raw p-value | adj. p-value |
| electron transport chain                       | GO:0022900 | 2.24e-07    | 0.0008       |
| apoptotic process                              | GO:0006915 | 2.47e-06    | 0.0031       |
| generation of precursor metabolites and energy | GO:0006091 | 3.57e-06    | 0.0031       |
| programmed cell death                          | GO:0012501 | 3.64e-06    | 0.0031       |
| death                                          | GO:0016265 | 4.38e-06    | 0.0031       |
| cell death                                     | GO:0008219 | 5.50e-06    | 0.0032       |
| induction of apoptosis                         | GO:0006917 | 0.0001      | 0.0292       |
| regulation of apoptotic process                | GO:0042981 | 0.0001      | 0.0292       |
| induction of programmed cell death             | GO:0012502 | 7.68e-05    | 0.0292       |
| organophosphate metabolic process              | GO:0019637 | 0.0001      | 0.0292       |
| Down-regulated genes                           |            |             |              |
| RNA metabolic process                          | GO:0016070 | 1.04e-10    | 2.79e-07     |
| cellular macromolecule metabolic process       | GO:0044260 | 9.61e-10    | 8.59e-07     |
| nucleic acid metabolic process                 | GO:0090304 | 9.35e-10    | 8.59e-07     |
| nucleobase-containing metabolic process        | GO:0006139 | 1.40e-09    | 9.39e-07     |
| gene expression                                | GO:0010467 | 5.97e-09    | 2.29e-06     |
| cellular metabolic compound metabolic process  | GO:0006725 | 5.42e-09    | 2.29e-06     |
| heterocycle metabolic process                  | GO:0046483 | 5.76e-09    | 2.29e-06     |
| RNA processing                                 | GO:0006396 | 1.69e-08    | 5.67e-06     |
| cellular nitrogen compound metabolic process   | GO:0034641 | 2.74e-08    | 8.17e-06     |
| organic cyclic compound metabolic process      | GO:1901360 | 4.32e-08    | 1.16e-05     |

Note: Enrichment of Gene Ontology Terms for biological processes was analyzed for significantly up- and down-regulated genes on a background of Affymetrix Mouse 420a v. 2.0 platform (GPL8321). The table contains top 10 significantly enriched biological processes terms.

**Supplementary Table 2.** Enrichment of KEGG Pathways in T<sub>reg</sub> cells compared to conventional T cells in B16 melanoma tissues (data series GSE55705).

| Up-regulated pathways                       |             |              |
|---------------------------------------------|-------------|--------------|
| Pathway name                                | raw p-value | adj. p-value |
| metabolic pathways                          | 1.07e-62    | 1.99e-60     |
| Huntington's disease                        | 1.53e-25    | 1.42e-23     |
| Alzheimer's disease                         | 3.28e-24    | 2.03e-22     |
| Parkinson's disease                         | 2.31e-21    | 1.07e-19     |
| oxidative phosphorylation                   | 2.58e-19    | 9.60e-18     |
| pathways in cancer                          | 5.97e-16    | 1.85e-14     |
| MAPK signaling pathway                      | 8.74e-14    | 2.09e-12     |
| cell cycle                                  | 8.97e-14    | 2.09e-12     |
| proteasome                                  | 5.58e-13    | 1.15e-11     |
| p53 signaling pathway                       | 3.86e-10    | 4.22e-09     |
| pyrimidine metabolism                       | 6.14e-10    | 6.34e-09     |
| purine metabolism                           | 5.71e-06    | 2.21e-05     |
| apoptosis                                   | 2.11e-05    | 7.11e-05     |
| chemokine signaling pathway                 | 4.59e-12    | 8.54e-11     |
| pyruvate metabolism                         | 0.0004      | 0.0011       |
| fatty acid metabolism                       | 0.0006      | 0.0013       |
| Down-regulated pathways                     |             |              |
| ribosome                                    | 3.18e-09    | 5.15e-07     |
| ribosome biogenesis in eukaryotes           | 0.0005      | 0.0324       |
| RNA transport                               | 0.0006      | 0.0324       |
| spliceosome                                 | 0.0060      | 0.2430       |
| acute myleoid leukemia                      | 0.0241      | 0.7128       |
| valine, leucine and isoleucine biosynthesis | 0.0286      | 0.7128       |
| aldosterone-regulated sodium reabsorption   | 0.0308      | 0.7128       |
| RNA degradation                             | 0.0363      | 0.7351       |
| colorectal cancer                           | 0.0442      | 0.7956       |
| apoptosis                                   | 0.3392      | 0.7990       |

Note: Enrichment of KEGG Pathways were analyzed for significantly up- and down-regulated genes on a background of mouse genome. The table contains top 10

enriched pathways and some other statistically enriched pathways. Additionally, of the up-regulated pathways there are some significantly enriched pathways (below dashed line), but not in top 10.

**Supplementary Table 3.** Primers for real-time PCR analysis (5' → 3')

| Gene ID<br>(GeneBank) | Human                  |                          |
|-----------------------|------------------------|--------------------------|
|                       | Forward                | Reverse                  |
| Bbc3                  | TGGGTGAGACCCAGTAAGGA   | CTCCCTGGGGCCACAAATCT     |
| BclxL                 | AGACCCCCAGTGCCATCAAT   | CATCCAAACTGCTGCTGTGCG    |
| Bcl2                  | GGAGGCTGGGATGCCTTTGT   | AAAGCCAGCTTCCCCAATGA     |
| Bim                   | GGTCTGCAGTTTGTGGAGC    | ATGGAAGCCATTGCACTGAGA    |
| Bax                   | TTTGCTTCAGGGTTTCATCCA  | CTGGAGACAGGGACATCAGT     |
| Casp3                 | GCTCTGGTTTTTCGGTGGGTG  | ACCACGGCAGGCCTGAATAAT    |
| Casp8                 | AGCCCTGCTGAATTTGCTAGTC | CAGGAGAATATAATCCGCTCCAC  |
| Casp9                 | CAGGCCCATATGATCGAGG    | TCAAGAGCACCGACATCACC     |
| Fas                   | CCCTGTCCTCCAGGTGAAAG   | AGACAAAGCCACCCCAAGTT     |
| Gapdh                 | CTCCTCCTGTTCGACAGTCA   | TGCAGGAGGCATTGCTGATG     |
| Gclc                  | ACCAGACCGGCAAAGAGAAG   | CCAGGACAGCCTAATCTGGG     |
| Gclm                  | AAGCACTTTCTCGGCTACGA   | TCATGAAGCTCCTCGCTGTG     |
| Ggct                  | CAGAGAGGATCCACCTCCGA   | TAACCCCTTCTTGCTCATCCAG   |
| Hmox1                 | GTGCCACCAAGTTCAAGCAG   | CACGCATGGCTCAAAAACCA     |
| Mcl1                  | GACTTTTGGCTACGGAGAAGGA | AACTCCACAAACCCATCCCAG    |
| Nqo1                  | GCTGGTTTGAGCGAGTGTTT   | CTGCCTTCTTACTCCGGAAGG    |
| Nrf2                  | CGACCTTCGCAAACAACCTCT  | TGTGGGCAACCTGGGAGTAG     |
| Gene ID<br>(GeneBank) | Mouse                  |                          |
|                       | Forward                | Reverse                  |
| Bbc3                  | CATAGAGCCACATGCGAGCG   | TGCTCTTCTTGTCTCCGCCG     |
| BclxL                 | ACCTCCTCCCCGACCTATGA   | CTATCTCCGGCGACCAGCAA     |
| Bcl2                  | CAGCCTGAGAGCAACCCAAT   | TATAGTTCCACAAAGGCATCCCAG |
| Bim                   | CTGCGAGCTGTGTTCCACTT   | ATGGAAGCCATTGCACTGAGA    |
| Bax                   | GAGCTGCAGAGGATGATTGC   | CTTGGATCCAGACAAGCAGC     |
| Casp3                 | GAGCTTGGAACGGTACGCTA   | GCGAGATGACATTCCAGTGC     |

|       |                       |                        |
|-------|-----------------------|------------------------|
| Casp8 | AGAAAGCGAAGCAGCCTATGG | TAGAAGAGCTGTAACCTGTGGC |
| Casp9 | GCGCGACATGATCGAGGATA  | TGGTCTTTCTGCTCACCACC   |
| Fas   | TGCTTGCTGGCTCACAGTTA  | GTTCCATGTTCACACGAGGC   |
| Gapdh | CCCTTAAGAGGGATGCTGCC  | TACGGCCAAATCCGTTTACA   |
| Gclc  | TTGGGTCGCAAGTAGGAAGC  | GTTAGAGTACCGAAGCGGGG   |
| Gclm  | TGGGCACAGGTAAAACCCAA  | CACCCTGATGCCTAAGCCAA   |
| Ggct  | CGCCTGCAGGACTTTAAGC   | AAGCCGATCGGATACAAGCA   |
| Hmox1 | GAGCAGAACCAGCCTGAACT  | AAATCCTGGGGCATGCTGTC   |
| Mcl1  | CAAAGAGGCTGGGATGGGTTT | CCCTATTGCACTCACAAGGC   |
| Nqo1  | CCGATTCAGAGTGGCATCCT  | GAGCAATTCCCTTCTGCCCT   |
| Nrf2  | TTGCCCTAGCCTTTTCTCCG  | ATGTGGGCAACCTGGGAGTA   |

---
